# Supplementary material for: Genotypic Diversity and Pathogenic Potential of Clinical and Environmental Vibrio parahaemolyticus Isolates From Brazil
Source: PubMed Central journal article supplement (PMC7994283; doi:10.3389/fmicb.2021.602653), 2021-03-12
Supplement: Image_3.pdf [file Image_3.pdf]

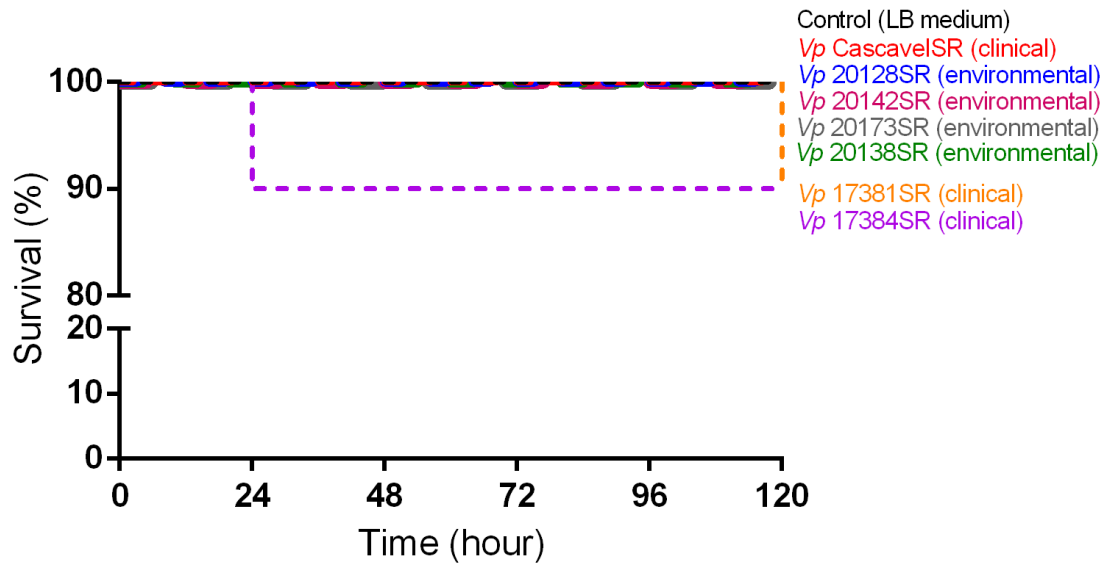

**Supplementary Figure S3. Survival curves of mice inoculated with  $10^6$  CFU/animal of each of seven *V. parahaemolyticus* strains.** Each test group contained  $n = 10$  animals per strain. Control group: mice inoculated with LB medium,  $n = 5$  animals. Survival curves of mice in each group were generated using the Kaplan-Meier method (Kaplan and Meier, 1958) and compared using the log-rank test (Mantel, 1966; Peto and Peto, 1972), with  $p$ -values  $< 0.05$  considered statistically significant.
