# Supplementary material for: Genotypic Diversity and Pathogenic Potential of Clinical and Environmental Vibrio parahaemolyticus Isolates From Brazil
Source: PubMed Central journal article supplement (PMC7994283; doi:10.3389/fmicb.2021.602653), 2021-03-12
Supplement: Image_4.pdf [file Image_4.pdf]

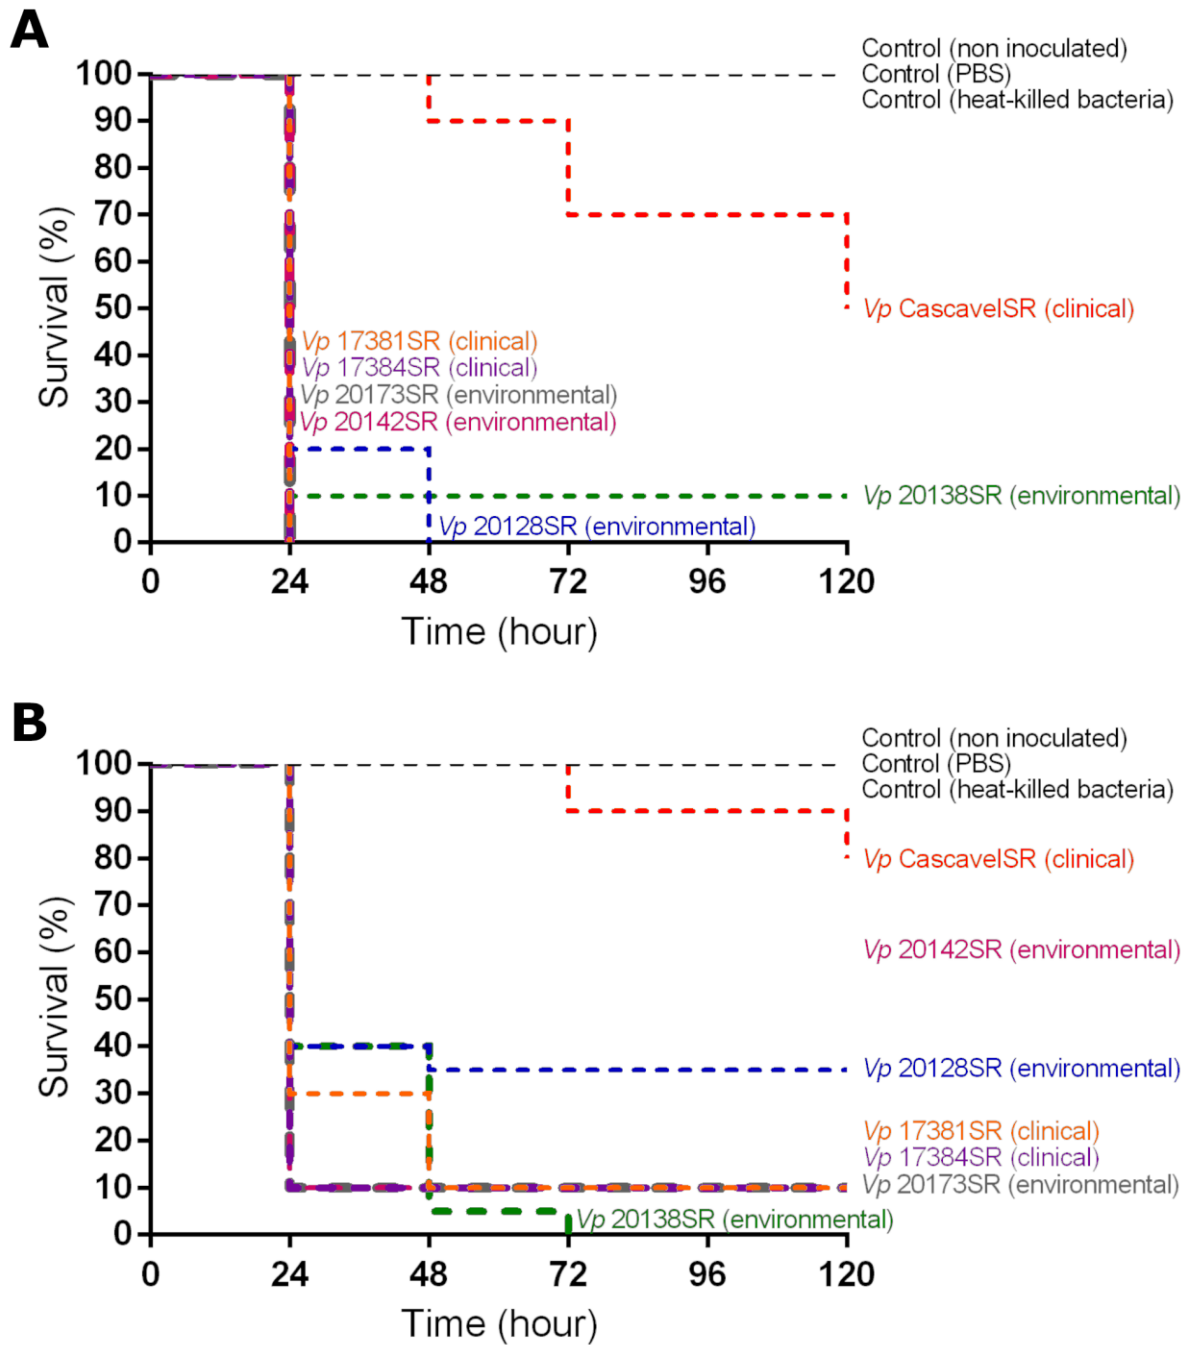

**Supplementary Figure S4. Survival curves of *G. mellonella* larvae inoculated with (A)  $10^6$  CFU/larva and (B)  $10^5$  CFU/larva of each of the seven *V. parahaemolyticus* strains.** Each group contained  $n = 20$  larvae per dose of each strain. Three control groups were used: non inoculated, inoculated with PBS and heat-killed bacteria,  $n = 10$  larvae per group. Survival curves of larvae in each group were generated using the Kaplan-Meier method (Kaplan and Meier, 1958) and compared using the log-rank test (Mantel, 1966; Peto and Peto, 1972), with  $p$ -values  $< 0.05$  considered statistically significant.
